# Supplementary material for: Outcomes of steroid-resistant nephrotic syndrome in children not treated with intensified immunosuppression
Source: PubMed Central journal article supplement (PMC10060323; doi:10.1007/s00467-022-05762-4), 2022-10-31
Supplement: 467_2022_5762_MOESM2_ESM.pdf [file 467_2022_5762_MOESM2_ESM.pdf]

# Outcomes of steroid-resistant nephrotic syndrome in children not treated with intensified immunosuppression

Agnes Trautmann<sup>1</sup>, Svenja Seide<sup>2</sup>, Beata S. Lipska-Ziętkiewicz<sup>3</sup>, Fatih Ozaltın<sup>4</sup>, Maria Szczepanska<sup>5</sup>, Marta Azocar<sup>6</sup>, Augustina Jankauskiene<sup>7</sup>, Alexandra Zurowska<sup>8</sup>, Salim Caliskan<sup>9</sup>, Bassam Saeed<sup>10</sup>, William Morello<sup>11</sup>, Francesco Emma<sup>12</sup>, Mieczyslaw Litwin<sup>13</sup>, Alexey Tsygin<sup>14</sup>, Svitlana Fomina<sup>15</sup>, Anna Wasilewska<sup>16</sup>, Anette Melk<sup>17</sup>, Elisa Benetti<sup>18</sup>, Jutta Gellermann<sup>19</sup>, Natasa Stajic<sup>20</sup>, Marcin Tkaczyk<sup>21</sup>, Sergey Baiko<sup>22</sup>, Larisa Prikhodina<sup>23</sup>, Dagmar Csaicsich<sup>24</sup>, Anna Medynska<sup>25</sup>, Regina Krisam<sup>2</sup>, Heike Breitschwerdt<sup>2</sup>, Franz Schaefer<sup>1</sup> for the PodoNet Consortium.

<sup>1</sup> Division of Pediatric Nephrology, University Center for Pediatrics and Adolescent Medicine, Heidelberg, Germany

<sup>2</sup> Institute of Medical Biometry, University of Heidelberg, Germany

<sup>3</sup> Rare Diseases Centre and Clinical Genetics Unit, Department of Biology and Medical Genetics, Medical University of Gdansk, Gdansk, Poland

<sup>4</sup> Department of Pediatric Nephrology, Nephrogenetics Laboratory and Center for Biobanking and Genomics, Hacettepe University, Ankara, Turkey

<sup>5</sup> Department of Pediatrics, School of Medicine with the Division of Dentistry, Zabrze, Poland

<sup>6</sup> Pediatric Nephrology, Hospital Luis Calvo Mackenna-Facultad de Medicina Universidad de Chile, Santiago de Chile

<sup>7</sup> Pediatric Center, Institute of Clinical medicine, Vilnius University, Lithuania

<sup>8</sup> Department of Pediatrics, Nephrology & Hypertension, Medical University of Gdansk, Gdansk, Poland

<sup>9</sup> Pediatric Nephrology Departement, Cerrahpaşa Medical Faculty, Istanbul University-Cerrahpasa, Turkey

<sup>10</sup> Farah Association for Child with Kidney Disease in Syria, Damascus, Syria

<sup>11</sup> Pediatric Nephrology, Dialysis and Transplant Unit, Fondazione IRCCS Ca'Granda, Ospedale Maggiore Policlinico, Milano, Italy

<sup>12</sup> Department of Pediatric Subspecialties, Nephrology and Dialysis Unit, Children's Hospital Bambino Gesù, IRCCS, Rome, Italy

<sup>13</sup> Department of Pediatric Nephrology, The Children's Memorial Health Center, Warsaw, Poland

<sup>14</sup> National Medical and Research Center for Children's Health, Moscow, Russia

<sup>15</sup> Department of Pediatric Nephrology, State Institution "Institute of Nephrology of NAMS of Ukraine", Kyiv, Ukraine

<sup>16</sup> Department of Pediatric Nephrology, University Hospital, Bialystok, Poland

<sup>17</sup> Department of Pediatric Kidney, Liver and Metabolic Diseases, Hannover Medical School, Hannover, Germany

<sup>18</sup> Pediatric Nephrology, Dialysis and Transplant Unit, Department of Women's and Children's Health, Padua University Hospital, Padua, Italy

<sup>19</sup> Clinic for Pediatric Nephrology, Charite Hospital, Berlin, Germany

<sup>20</sup> Department of Pediatric Nephrology, Institute of Mother and Healthcare of Serbia, Belgrade, Serbia

<sup>21</sup> Pediatric Nephrology Division, Polish Mothers Memorial Hospital Research Institute, Lodz, Poland

<sup>22</sup> National Center for Pediatric Nephrology and Renal Replacement Therapy, Belarusian State Medical University, Minsk, Belarus

<sup>23</sup> Division of Inherited & Acquired Kidney Diseases, Research & Clinical Institute for Pediatrics, Pirogov Russian National Research Medical University, Moscow, Russia

<sup>24</sup> Department of Pediatrics, Medical University Vienna, Vienna, Austria

<sup>25</sup> Department of Pediatric Nephrology, Wroclaw Medical University, Wroclaw, Poland

## SUPPLEMENTAL MATERIAL:

### CONTENT:

**Table S-1:** Molecular diagnosis in the 39 patients diagnosed with genetic SRNS.

**Table S-2:** Characteristics of children with genetic podocytopathies and reported transient complete or partial proteinuria normalization.

**Table S-3:** Characteristics and outcome of children with non-genetic SRNS and non-IIS treatment

**Table S-4:** Change of eGFR in children with non-genetic SRNS within the observation period of 3 years

**Table S-1:** Molecular diagnosis in the 39 patients diagnosed with genetic SRNS.

| <b>Causative gene</b>         | <b>Frequency<br/>N (%)</b> | <b>Transient/<br/>sustained<br/>Complete rem.</b> | <b>Transient/<br/>sustained<br/>Partial rem.</b> |
|-------------------------------|----------------------------|---------------------------------------------------|--------------------------------------------------|
| <i>NPHS2</i>                  | 10 (25.6)                  | -                                                 | 1 / -                                            |
| <i>WT1</i>                    | 6 (15.4)                   | 1 / -                                             | 2 / 1                                            |
| <i>PLCE1</i>                  | 5 (12.8)                   | 2 / -                                             | 1 / 1                                            |
| <i>SMARCAL1</i>               | 3 (7.7)                    | -                                                 | -                                                |
| <i>COL4A5</i>                 | 2 (5.6)                    | -                                                 | 1 / -                                            |
| <i>COL4A4</i>                 | 2 (5.6)                    | 1 / -                                             | 1 / -                                            |
| <i>CLCN5</i>                  | 2 (5.6)                    | -                                                 | -                                                |
| <i>NUP93</i>                  | 2 (5.6)                    | 1 / -                                             | -                                                |
| <i>NPHS1</i>                  | 1 (2.6)                    | -                                                 | -                                                |
| <i>INF2</i>                   | 1 (2.6)                    | -                                                 | 1 / 1                                            |
| <i>COQ8B</i>                  | 1 (2.6)                    | -                                                 | 1 / -                                            |
| <i>COQ6</i>                   | 1 (2.6)                    | 1 / -                                             | -                                                |
| <i>NUP205</i>                 | 1 (2.6)                    | -                                                 | -                                                |
| Microdeletion at chrom. 11p   | 1 (2.6)                    | -                                                 | -                                                |
| Microduplication at chrom. 6p | 1 (2.6)                    | -                                                 | 1 / -                                            |
| <b>All</b>                    | <b>39</b>                  | <b>6 / -</b>                                      | <b>9 / 3</b>                                     |

**Table S-2:** Characteristics of children with genetic podocytopathies and reported transient complete or partial proteinuria normalization.

**Abbreviations:** RAAS antagonist = renin-angiotensin aldosterone system antagonist; CKD = chronic kidney disease, Kidney failure = CKD stage 5 and/or start of kidney replacement therapy. Hom. – homozygote; Het. – heterozygote; Comp. Het. – compound heterozygote

**Reference sequences:** COL4A4 (NM\_000092.5); COL4A5(NM\_033380.3); COQ8B (NM\_024876.4); INF2 (NM\_022489.4); NPHS2 (NM\_014625.4); PLEC1 (NM\_016341.4); WTT1 (NM\_024426.6)

| Gene                                                                            | Mutation                                                     | Age at disease onset (yrs) | S-albumin at disease onset (g/l) | Familial disease | Remission – time after disease onset (yrs) | Duration of remission (yrs) | RAAS Antagonist (± oral steroid) | RAAS Exposure (% of max. approved dose) | Follow-up (yrs) | Remission status at last observation | Status at last observation |
|---------------------------------------------------------------------------------|--------------------------------------------------------------|----------------------------|----------------------------------|------------------|--------------------------------------------|-----------------------------|----------------------------------|-----------------------------------------|-----------------|--------------------------------------|----------------------------|
|                                                                                 |                                                              |                            |                                  |                  |                                            |                             |                                  |                                         |                 |                                      |                            |
| WTT1                                                                            | c.1387C>T p.(Arg463Ter) het. (alias p.R390X, p.Arg458Ter)    | 0.9                        | 39                               | no               | 1.1                                        | 0.5                         | Ramipril                         | 65.1%                                   | 2.1             | Partial rem.                         | CKD2                       |
| COL4A4                                                                          | c.2968+2T>C hom.                                             | 8.4                        | 45                               | yes              | 2.3                                        | 0.5                         | Enalapril                        | 63.3%                                   | 4.8             | No rem.                              | CKD1                       |
| PLEC1                                                                           | c.5560C>T p.(Gln1854Ter) hom.                                | 0.8                        | 44                               | yes              | 3.3                                        | 0.8                         | Enalapril                        | 37.2%                                   | 13.1            | Partial rem.                         | CKD 1                      |
| PLEC1                                                                           | c.5560C>T p.(Gln1854Ter) hom.                                | 1.0                        | 43                               | yes              | 8.3                                        | 4.5                         | Enalapril                        | 13.3%                                   | 18.6            | Partial rem.                         | CKD 1                      |
| <b>Nephrotic-range proteinuria -&gt; Partial remission (Secondary analysis)</b> |                                                              |                            |                                  |                  |                                            |                             |                                  |                                         |                 |                                      |                            |
| COQ8B                                                                           | c.293T>G p.(Leu98Arg) hom.                                   | 13.5                       | 35                               | yes              | 0.6                                        | 0.8                         | Enalapril, Losartan              | 97.2%                                   | 2.4             | No rem.                              | Kidney failure             |
| COL4A4                                                                          | c.2968+2T>C hom..                                            | 10.1                       | 37                               | yes              | 1.4                                        | 2.0                         | Enalapril, Losartan              | 65.7%                                   | 5.4             | No rem.                              | CKD1                       |
| COL4A5                                                                          | c.4750A>C p.(Ser1584Arg) het.                                | 16.3                       | 43                               | yes              | 0.6                                        | 0.8                         | Ramipril, Losartan               | 38.1%                                   | 1.4             | No rem.                              | CKD1                       |
| INF2                                                                            | c.652C>T p.(Arg218Trp) het.                                  | 16.7                       | 50                               | yes              | 0.7                                        | -                           | Ramipril                         | 30.7%                                   | 0.7             | Partial rem.                         | CKD1                       |
| NPHS2                                                                           | c.506T>C p.(Leu169Pro) hom.                                  | 4.5                        | n.a.                             | yes              | 2.2                                        | 4.5                         | Enalapril, Losartan              | 78.8%                                   | 7.2             | No rem.                              | CKD2                       |
| PLEC1                                                                           | c.1477C>T p.(Arg493Ter); c.5891G>T p.(Arg1964Leu) comp. het. | 1.4                        | n.a.                             | no               | 0.2                                        | 0.9                         | Enalapril                        | 56.8%                                   | 1.1             | Partial rem.                         | CKD1                       |
| WTT1                                                                            | c.1387C>T p.(Arg463Ter) het. (alias p.R390X, p.Arg458Ter)    | 18.5                       | 40                               | no               | 0.5                                        | 7.5                         | Ramipril, Losartan               | 67.7%                                   | 9.0             | Partial rem.                         | CKD2                       |
| WTT1                                                                            | c.1399C>T p.(Arg467Trp) het. (alias (p.R394W, p.Arg462Trp)   | 1.3                        | 23                               | unknown          | 3.0                                        | 1.8                         | Ramipril, Losartan               | 174.7%                                  | 6.1             | No rem.                              | CKD1                       |
| arflhg181                                                                       | 6p25.3(92934-1172037)x1, 6p25.3p22.1(1172038-29167599)x3     | 0.7                        | 24                               | no               | 8.4                                        | 0.9                         | Enalapril, Losartan              | 54.9%                                   | 9.3             | Transplanted                         | Transplanted               |

**Table S-3: Characteristics and outcome of children with non-genetic SRNS and non-ILS treatment.**

Abbreviations: RAAS antagonist = renin-angiotensin aldosterone system antagonist, CKD = chronic kidney disease, Kidney failure = CKD stage 5 and/or start of kidney replacement therapy

| Age at disease onset (yrs)                                  | S-albumin at disease onset (g/l) | Kidney function at disease onset | Familial disease | Remission – time after disease onset (yrs) | Duration of remission (yrs) | Duration of steroid treatment (yrs) | RAAS Antagonist (± oral steroid) | RAAS Exposure (% of max. approved dose) | Follow-up (yrs) | Remission status at last observation | Status at last observation |
|-------------------------------------------------------------|----------------------------------|----------------------------------|------------------|--------------------------------------------|-----------------------------|-------------------------------------|----------------------------------|-----------------------------------------|-----------------|--------------------------------------|----------------------------|
| <b>Nephrotic range proteinuria -&gt; Complete remission</b> |                                  |                                  |                  |                                            |                             |                                     |                                  |                                         |                 |                                      |                            |
| 2.0                                                         | 29                               | CKD I                            | yes              | 0.6                                        | 4.3                         | 0.6                                 | Enalapril                        | 27.8                                    | 4.9             | Complete rem.                        | CKD I                      |
| 13.2                                                        | 29                               | CKD II                           | no               | 0.5                                        | 2.1                         | 2.5                                 | Enalapril                        | 20.9                                    | 2.6             | Complete rem.                        | CKD I                      |
| 13.8                                                        | 35                               | CKD II                           | yes              | 0.5                                        | 0.6                         | 1.5                                 | Enalapril, Losartan              | 80.2                                    | 1.8             | No remission                         | CKD IV                     |
| 6.4                                                         | 45                               | CKD I                            | Not defined      | 0.8                                        | 6.7                         | -                                   | Enalapril, Losartan              | 46.1                                    | 10.1            | Partial rem.                         | CKD II                     |
| 16.0                                                        | 44                               | CKD II                           | Not defined      | 1.2                                        | 1.5                         | -                                   | Enalapril, Losartan              | 38.1                                    | 2.6             | Complete rem.                        | CKD I                      |
| 10.8                                                        | 40                               | CKD III                          | Not defined      | 2.5                                        | 2.6                         | 0.1                                 | Enalapril                        | 18.7                                    | 5.1             | Complete rem.                        | CKD III                    |
| 2.2                                                         | 22                               | CKD I                            | no               | 0.2                                        | 2.5                         | 0.3                                 | -                                | -                                       | 2.7             | Complete rem.                        | n.a.                       |
| 1.1                                                         | 14                               | n.a.                             | no               | 0.6                                        | -                           | 0.6                                 | Enalapril                        | 15.2                                    | 0.6             | Complete rem.                        | CKD I                      |
| 4.2                                                         | 28                               | CKD I                            | no               | 0.9                                        | -                           | 0.3                                 | Enalapril                        | 8.6                                     | 0.9             | Complete rem.                        | CKD I                      |
| 10.3                                                        | 18                               | CKD II                           | Not defined      | 1.7                                        | 1.7                         | 0.5                                 | Ramipril                         | 36.3                                    | 3.3             | Complete rem.                        | CKD I                      |
| 0.5                                                         | 36                               | CKD I                            | no               | 0.3                                        | 2.4                         | 0.3                                 | Ramipril                         | 23.6                                    | 2.7             | Complete rem.                        | CKD I                      |
| 2.2                                                         | 19                               | CKD III                          | no               | 0.8                                        | 2.3                         | 0.8                                 | Enalapril                        | 90.4                                    | 3.1             | Complete rem.                        | CKD I                      |
| 0.3                                                         | 19                               | CKD I                            | no               | 0.6                                        | 2.5                         | 0.2                                 | Enalapril                        | 91.2                                    | 3.1             | Complete rem.                        | CKD I                      |
| 0.4                                                         | 16                               | CKD I                            | no               | 3.3                                        | 2.3                         | 0.2                                 | Enalapril, Losartan              | 112.3                                   | 5.6             | Complete rem.                        | CKD I                      |
| 10.0                                                        | 35                               | CKD II                           | yes              | 0.9                                        | 0.4                         | -                                   | Ramipril                         | 87.7                                    | 3.2             | No remission                         | CKD III                    |
| 1.0                                                         | 19                               | CKD I                            | no               | 4.5                                        | 4.0                         | 2.6                                 | Enalapril                        | 15.9                                    | 8.5             | Complete rem.                        | CKD I                      |

| Age at disease onset (yrs)                                 | S-albumin at disease onset (g/l) | Kidney function at disease onset | Familial disease | Remission – time after disease onset (yrs) | Duration of remission (yrs) | Duration of steroid treatment (yrs) | RAAS Antagonist (± oral steroid) | RAAS Exposure (% of max. approved dose) | Follow-up (yrs) | Remission status at last observation | Status at last observation |
|------------------------------------------------------------|----------------------------------|----------------------------------|------------------|--------------------------------------------|-----------------------------|-------------------------------------|----------------------------------|-----------------------------------------|-----------------|--------------------------------------|----------------------------|
| 4.3                                                        | 36                               | CKD I                            | no               | 0.4                                        | -                           | 0.4                                 | Ramipril                         | 18.5                                    | 0.4             | Complete rem.                        | CKD I                      |
| 8.4                                                        | 39                               | CKD I                            | Not defined      | 1.4                                        | 3.3                         | 1.1                                 | Ramipril, Losartan               | 116.2                                   | 4.7             | Partial rem.                         | CKD I                      |
| <b>Nephrotic-range proteinuria -&gt; Partial remission</b> |                                  |                                  |                  |                                            |                             |                                     |                                  |                                         |                 |                                      |                            |
| 8.0                                                        | 38                               | CKD III                          | yes              | 1.9                                        | 7.0                         | 0.02                                | Enalapril, Losartan              | 50.2                                    | 10.2            | No remission                         | CKD IV                     |
| 7.3                                                        | 48                               | CKD I                            | yes              | 1.6                                        | 2.0                         | -                                   | Enalapril                        | n.a.                                    | 3.5             | Partial rem.                         | CKD I                      |
| 6.6                                                        | 24                               | CKD I                            | no               | 1.0                                        | 5.7                         | 6.6                                 | Enalapril, Losartan              | 82.4                                    | 6.6             | Partial rem.                         | CKD II                     |
| 2.4                                                        | 30                               | CKD II                           | Not defined      | 0.3                                        | 2.0                         | 0.3                                 | Enalapril, Losartan              | 283.1                                   | 2.3             | Partial rem.                         | CKD I                      |
| 6.1                                                        | 42                               | n.a.                             | Not defined      | 3.1                                        | 5.8                         | -                                   | Enalapril, Losartan              | 105.1                                   | 8.9             | Partial rem.                         | CKD I                      |
| 1.3                                                        | -                                | n.a.                             | Not defined      | 6.5                                        | 1.6                         | 0.7                                 | Ramipril                         | 66.2                                    | 8.2             | Partial rem.                         | CKD I                      |
| 13.0                                                       | 37                               | CKD II                           | yes              | 1.7                                        | 0.7                         | -                                   | Ramipril                         | 66.2                                    | 2.4             | n.a.                                 | CKD III                    |
| <b>Nephrotic-range proteinuria -&gt; No remission</b>      |                                  |                                  |                  |                                            |                             |                                     |                                  |                                         |                 |                                      |                            |
| <b>Time to Kidney failure (yrs)</b>                        |                                  |                                  |                  |                                            |                             |                                     |                                  |                                         |                 |                                      |                            |
| 0.4                                                        | 44                               | CKD I                            | Not defined      | -                                          | -                           | -                                   | Enalapril                        | 18.0                                    | 5.4             | No remission                         | CKD I                      |
| 0.3                                                        | 24                               | CKD I                            | yes              | -                                          | -                           | -                                   | Captopril                        | 15.8                                    | 0.9             | No remission                         | CKD IV                     |
| 19.8                                                       | 40                               | CKD III                          | yes              | -                                          | 2.4                         | -                                   | Ibuprofen                        | 155.7                                   | 3.1             | No remission                         | Kidney failure             |
| 5.8                                                        | 7                                | CKD I                            | no               | -                                          | 0.7                         | -                                   | Enalapril                        | 45.0                                    | 0.7             | No remission                         | Kidney failure, deceased   |
| 0.3                                                        | 28                               | CKD II                           | no               | -                                          | -                           | 1.56                                | Enalapril                        | 17.3                                    | 5.1             | No remission                         | CKD II                     |
| 0.5                                                        | 18                               | CKD II                           | Not defined      | -                                          | -                           | 0.02                                | Enalapril, Losartan              | 227.9                                   | 1.0             | No remission                         | CKD I                      |

**Table S4: Change of eGFR in children with non-genetic SRNS (n=45) within the observation period of 3 years**

Estimated glomerular filtration rate (eGFR) given as median (IQR) and mean  $\pm$  SD; eGFR normalised to a maximum of 120 ml/min\*1.73 m<sup>2</sup> to avoid potential bias from hyperfiltration phenomenon

| Change of eGFR (ml/min*1.73 m <sup>2</sup> ) after 1st manifestation | Baseline eGFR      | 6 months (n=43) | 1 year (n=39)  | 2 years (n=35) | 3 years (n=31)  | Cumulative within 3 years |
|----------------------------------------------------------------------|--------------------|-----------------|----------------|----------------|-----------------|---------------------------|
| Median (IQR)                                                         | 98.2 (68.3; 120.0) | 0 (0; 3.7)      | 0 (-0.3; 0.7)  | 0 (-0.4; 2.2)  | 0 (-3.5; 1.4)   | 0 (-9.0; 13.5)            |
| Mean (SD)                                                            | 92.0 $\pm$ 28.8    | 4.4 $\pm$ 23.2  | -0.7 $\pm$ 7.8 | 0.4 $\pm$ 11.7 | -1.0 $\pm$ 11.7 | 3.7 $\pm$ 29.9            |
